# Supplementary material for: Iron exacerbates congenital cholestatic liver injury via bile acid-induced ferroptosis
Source: Research Square preprint supplement (doi:10.21203/rs.3.rs-6671814/v1), 2025-05-23
Supplement: Supplementary file 1 [file 341484dcf681d1fa4e405a35.docx]

**SUPPLEMENTAL INFORMAATION**

**Iron exacerbates congenital cholestatic liver injury via bile acid-induced ferroptosis**

Yudai Ohta1,2, Yohei Kanamori1, Ayato Maeda1,2, Mohamed Fathi Saleh1,2, Akihiro Nita2, Takashi Matsumoto1, Keiichi I. Nakayama3, Toshiro Moroishi1,2,*

1 Department ofMolecular and Medical Pharmacology, Faculty of Life Sciences, Kumamoto University, 1-1-1 Honjo, Kumamoto 860-8556, Japan.

2 Division of Cellular Dynamics, Medical Research Laboratory, Institute of Integrated Research, Institute of Science Tokyo, 1-5-45 Yushima, Tokyo 113-8510, Japan.

3 Anticancer Strategies Laboratory, Advanced Research Initiative, Institute of Integrated Research, Institute of Science Tokyo, 1-5-45 Yushima, Tokyo 113-8510, Japan.

*Correspondence: E-mail; moroishi.toshiro@tmd.ac.jp

**SUPPLEMENTAL FIGURE LEGENDS**

**Supplemental Figure 1. Liver-specific YAP-deficient mice exhibit characteristics of cholestatic liver injury**

(A) Immunoblot analysis of whole liver protein extracts from *Yap*flox/flox (control) and *Alb*-Cre/*Yap*flox/flox [YAP liver-KO (knockout)] mice livers (n = 3 for each group).

(B) Representative images of bile duct ink staining in control and YAP liver-KOmice at 10 weeks of age. Low- and high-magnification images are shown in panels on the left and right, respectively. White arrows indicate the extrahepatic bile duct; black arrowheads indicate the interlobular bile ducts; white arrowheads denote representative bile canaliculi. Scale bar; 2 mm.

(C) Histological analysis of the bile ducts and liver architecture. The left panel on the left shows representative immunohistochemical (IHC) staining for cytokeratin 19 (CK19) in control and YAP liver-KOmice at 10 weeks of age. Black arrowheads indicate tubular bile ducts, and white arrowheads indicate obstructed bile ducts. The panel on the right shows hematoxylin and eosin (H&E) staining of liver sections from control and YAP liver-KOmice at 10 weeks of age. Asterisks denote the representative areas of hepatic cell death. Scale bar; 50 μm.

**Supplemental Figure 2. Immunoblot analysis of YAP and FBXL5 mutant mice.**

(A) Immunoblot analysis of whole liver protein extracts from *Yap*flox/flox (control), *Alb*-Cre/*Yap*flox/flox (YAP liver-KO), *Alb*-Cre/*Fbxl5*flox/flox (FBXL5 liver-KO), *Alb*-Cre/*Yap*flox/flox /*Fbxl5*flox/flox  [YAP/FBXL5 liver-dKO (double knockout)] mice (n = 3 pergroup).

The Arrowhead indicates the IRP2 band.

**Supplemental Figure 3. Deoxycholic acid (DCA) induces cell death in a dose-dependent manner**

(A) Effect of varying DCA concentrations on cell death in precision-cut liver slices (PCLS) from *Yap*flox/flox (control) mouse livers. The left panel shows representative staining images, with DCA concentrations of 0, 800, 1000, and 1500 μM. Scale bar; 25 μm. The right panel presents quantification of cell viability at DCA concentrations of 0, 800, 1000, 1250, and 1500 μM. Cell viability was assessed by the ratio of PI-positive cells to Hoechst-positive cells. Data are presented as the mean ± SEM (n = 3 per concentration).
